# Supplementary material for: Subterranean Clover Stunt Virus Revisited: Detection of Two Missing Genome Components
Source: MDPI journal article supplement (doi:10.3390/v11020138), 2019-02-04
Supplement: s1 [file s1]

|                                   |                                                                |
|-----------------------------------|----------------------------------------------------------------|
| FBNYV-[ES;R4]_DNA-U2 KC979033     | 435-GCTAACGAAGAAGCGTTAGGGGAGTTTGTAGATATCACGGAAGGAGAGTAC-486    |
| FBNYV-[ES;Mu29D]_DNA-U2 KC979025  | 435-GCTAACGAAGAAGCGTTAGGGGAGTTTGTAGATATCACGGAAGGAGAGTAC-486    |
| FBNYV-[ES;R7]_DNA-U2 KC979041     | 435-GCTAACGAAGAAGCGTTAGGGGAGTTTCGTAGATATCACGGAAGGAGAGTAC-486   |
| FBNYV-[AZ;13.5]_DNA-U2 KC979015   | 435-GCTAACGAAGAAGCGTTAGGGGAGTTTGTAGATACCATGGAAGGAGAGTAG-486    |
| FBNYV-[MA;23]_DNA-U2 GQ274029     | 435-GCTAACGAAGAAGCCTTAGGAGAGTTTGTAGATATCATGGAAGGATAGTAT-486    |
| FBNYV-[SY;292-88]_DNA-U2 Y11409   | 435-GCTAACGAAGAAGCGTTAGGAGAGTTTGTAGATATCATGGAAGGATAGTAT-486    |
| FBNYV-[EG;1-93]_DNA-U2 AJ132184   | 435-GCTAACGAAGAAGCGTTAGGAGAGTTTGTAGATACCATGGAAGGAGAATAT-486    |
| FBNYV-[AZ;12]_DNA-U2 KC979006     | 435-GCTAACGAAGAAGCGTTAGGAGAGTTTGTAGATATCATGGAAGGAGAGTAC-486    |
| FBNSV-[AZ;1]_DNA-U2 KC978972      | 431-GCCCATGAAGATGTTCTTGGTGAATTCTGCAGACGCCATGGAAGAAGAGTTC-482   |
| FBNSV-[AZ;10]_DNA-U2 KC978980     | 431-GCCCATGAAGATGTTCTTGGTGAATTCTGCAGACGCCATGGAAGAAGAGTTC-482   |
| FBNSV-[MA;5]_DNA-U2 GQ274037      | 425-GCATACGAAGATGTTCTTGGAGAATTTTGCAGACGCCATGGAAGAAGAGTCC-476   |
| FBNSV-[ET;Ho1-97]_DNA-U2 GU983872 | 429-GCCACGAAGATGTTCTTGGTGAATTCTGCAGACTCCATGGAAGAAGAGTTC-480    |
| FBNSV-[AZ;15]_DNA-U2 KC978998     | 430-GCCCATGAAGATGTTCTTGGTGAATTCTGCAGACGCCATGGAAGAAGAGTTC-481   |
| FBYLV-[ET;231]_DNA-U2 HE654129    | 445-GCTCACGAAGATGTTCTTGGGGAATATGCAGATATCATGGAAGAAGAGTTA-496    |
| MDV-[JP;1]_DNA-U2 AB000926        | 422-CGC AATGAAGATGTTCTTGGAGAGATGTGCAGACGCCATGGAAGGAATTGC-473   |
| BMLRV-[AT;3]_DNA-U2 KC978945      | 452-TCCAATGAAGATATGTTGGGTCAGTTCCTGCAGACGCCATGGAAGAAGAGTCA-503  |
| BMLRV-[SE;153]_DNA-U2 KC978964    | 422-TCCAATGAAGATATGCTTGGTTCAGTTCCTGCAGACGCCATGGAAGAAGGCTCA-473 |
| BMLRV-[AZ;47]_DNA-U2 KC978955     | 425-TCTAACGAAGATATGTTGGGTCAGTTCCTGCAGACGCCATGGAAGAAGGCTCA-476  |
| PYSV-[AT;15]_DNA-U2 KC979059      | 500-TCAAATGAAGATATGCTTGGCAAGTTCCTGCAGACGCCATGGAAGAAGCGTCA-451  |
| PNYDV-[DE;15]_DNA-U2 JN133284     | 378-TTTAATGAAGATATGGTTGGAATTCGCTGTCGTCTCATGGAAGAAGAGTGA-440    |
| PNYDV-[AT;1]_DNA-U2 KC979049      | 379-TTTAATGAAGATATGGTTGGAATTCGCTGTCGTCTCATGGAAGAAGAGTGA-441    |
| nanoU2dir primer                  | TGYAGAYRYCATGGAAGRA                                            |

**Figure S1.** Multialignment of nanovirus DNA-U2 sequences. Alignment of multiple sequences was performed with MultAlign (INRA, Toulouse, URL: <http://multalin.toulouse.inra.fr/multalin/>). Sequences displayed span nucleotides from the respective 5'- to 3'-coordinates indicated. The sequence of the degenerate primer nanoU2dir is shown below the alignment

|                                   |                                                             |
|-----------------------------------|-------------------------------------------------------------|
| FBNYV-[ES;R4]_DNA-U4 KC979034     | 601-ATTCAAAGGTTGATGAAGAAGATGTGGAGTATTTAAACGGTCTGGCAA-650    |
| FBNYV-[ES;MU29D]_DNA-U4 KC979026  | 601-ATTCAAAGGTTGATGAAGAAGATGTGGAGTATTTAAACGGTCTGGCAA-650    |
| FBNYV-[ES;R7]_DNA-U4 KC979042     | 601-ATTCAAAGGTTGATGAAGAAGATGTGGAGTATTTAAACGGTCTGGCAA-650    |
| FBNYV-[AZ;13.5]_DNA-U4 KC979016   | 602-ATTCAAAGGTTGACGAAGAAGATGTGGAGTATTTCAAACGCTTCTGGCAA-651  |
| FBNYV-[MA;23]_DNA-U4 GQ274024     | 602-ATTCAAAGGTTGATGAAGAAGATGTGGAGTATTTCAAGACGGTCTGGCAA-651  |
| FBNYV-[SY;992-88]_DNA-U4 AJ749903 | 604-ATTCAAAGGTCGATGAAGAAGATGTGGAGTATTTAAACGATTTTGGCAA-653   |
| FBNYV-[EG;1-93]_DNA-U4 AJ749902   | 603-ACTCAAAGGTCGATGAAGAAGATGTGGAGTATTTCAAGACGATTTTGGCAA-652 |
| FBNSV-[AZ;12]_DNA-U4 KC979007     | 601-ATTCACACGTTGATGAAGATGATATGGAATATCTCAGACGGTCTGGCAA-650   |
| FBNSV-[AZ;1]_DNA-U4 KC978973      | 623-ACACAAAGGTTGAAGGTGACGATCTGGAATACTTGCAACGCCTATGGGAA-672  |
| FBNSV-[AZ;10]_DNA-U4 KC978981     | 623-ACACGAAGGTTGAAGGTGATGATCTGGAATACTTGCAACGCCTATGGGAA-672  |
| FBNSV-[MA;5]_DNA-U4 GQ274032      | 584-ACACGAAGGTTGAAGGAGATGATCTCGAATACTTGCAACGCCTATGGGAA-633  |
| FBNSV-[ET;Ho1-97]_DNA-U4 GU983873 | 614-AAACAAAGGTTGAAGGCGATGATCTTGAATATTTACAGCGATTGTGGGAA-663  |
| FBNSV-[AZ;15]_DNA-U4 KC978999     | 620-ATACGAAGGTCGAAGGTGATGATCTAGACTATCTTAAACGTATGTGGGAA-669  |
| FBYLV-[ET;231]_DNA-U4 HE654130    | 590-ATACGAAGGTGGACGATGAAGATTTGGAATATTTGCAACGTGTCTGGAAA-639  |
| PYSV-[AT;15]_DNA-U4 KC979061      | 598-ACGTGAAGGTTGAAGGTGAAGATTTAGAGTATTTACAGTCTATATGGAGA-647  |
| PNYDV-[DE;15]_DNA-U4 JN133285     | 598-ATGTCAAGGTTGAAGGTGAAGACCTGGAGTATTTACAGTCTTTATGGAAA-647  |
| PNYDV-[AT;1]_DNA-U4 KC979050      | 597-ATGTCAAGGTTGAAGGTGAAGACCTGGAGTATTTACAGTCTTTATGGAAA-646  |
| MDV-[JP;1]_DNA-U4 AB255373        | 576-ATACCTCTCTAGACGGTGAAGACCTTGAATATTTGCAACGTTTCTGGGAA-625  |
| BMLRV-[AT;3]_DNA-U4 KC978947      | 585-ATATGAAGATTGAAGACGATGACCTTGAGTATCTTCAAGGAATATGGGAT-634  |
| BMLRV-[SE;153]_DNA-U4 KC978965    | 576-ATATGAAGATTGAAGACGATGACCTTGAGTATCTTCAAGGAATATGGGAT-625  |
| BMLRV-[AZ;47]_DNA-U4 KC978956     | 577-ATATGAAGATTGAAGACGATGACATGGAGTACATCAAAAGATTATGGGAG-626  |
| nanoU4dir primer                  | GGTTGAHGRHGAHGAYSTGGARTA                                    |

**Figure S2.** Multialignment of nanovirus DNA-U4 sequences. Alignment of multiple sequences was performed with MultAlign (INRA, Toulouse, URL: <http://multalin.toulouse.inra.fr/multalin/>). Sequences displayed span nucleotides from the respective 5'- to 3'-coordinates indicated. The sequence of the degenerate primer nanoU4dir is shown below the alignment.

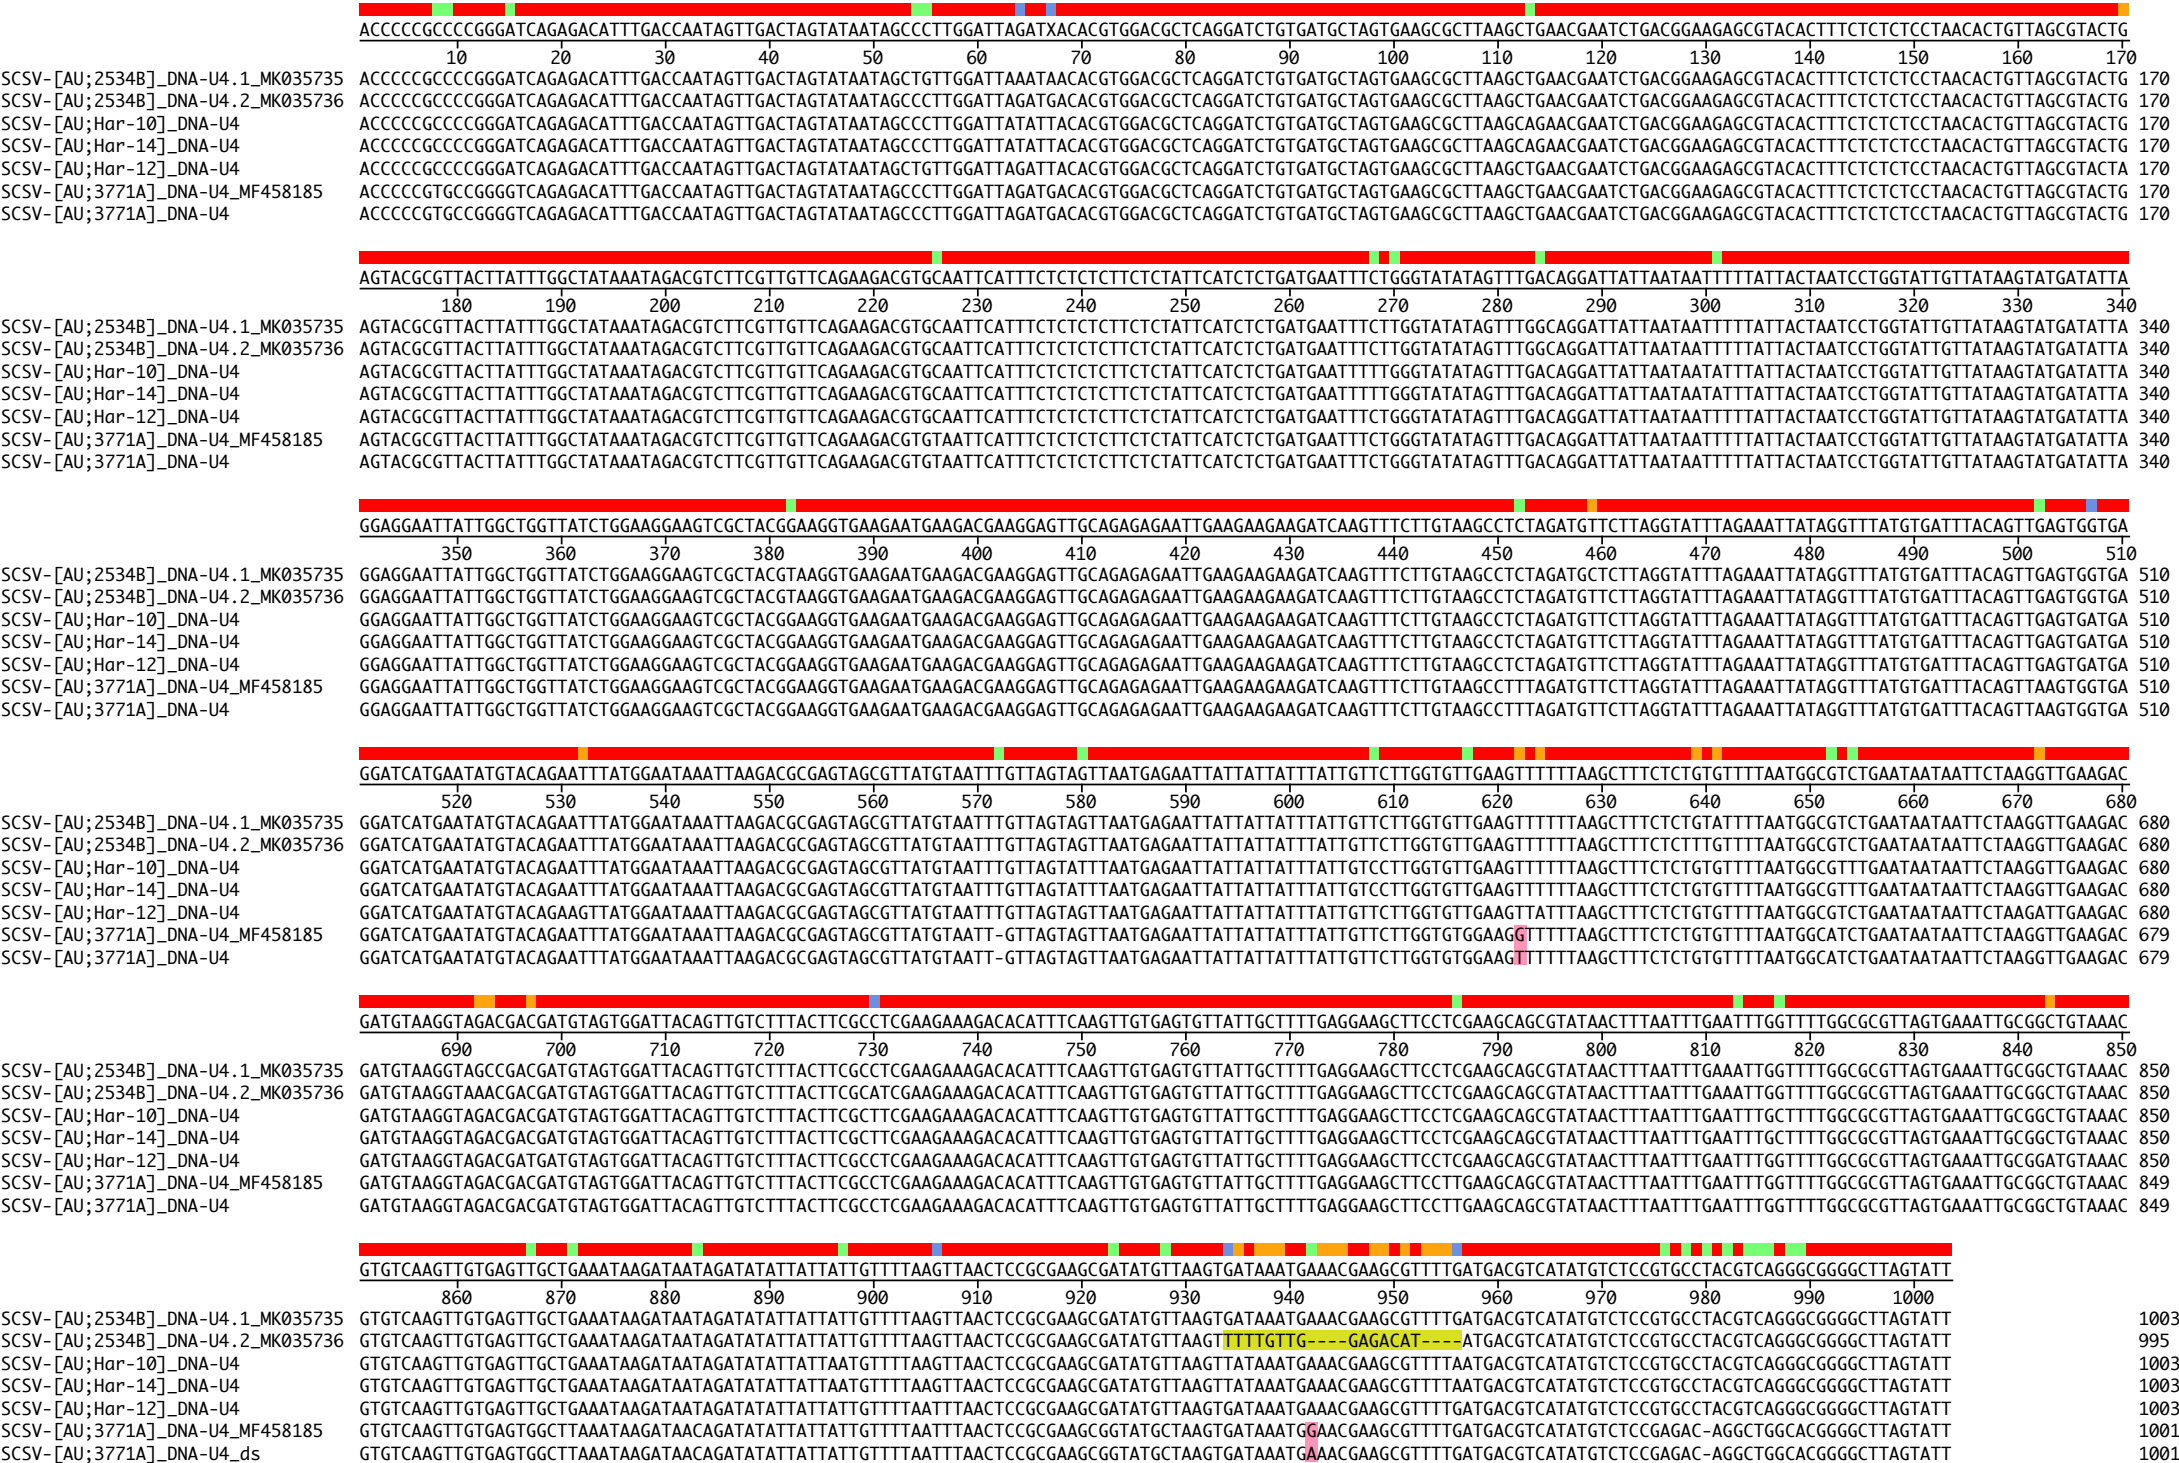

**Figure S3.** Multialignment of SCSV DNA-U4 sequences. Alignment was performed using MegAlign of DNA Star. The yellow box indicates sequence homologous to DNA-C. Pink boxes indicate nucleotide differences between two DNA-U4 sequences from SCSV-[AU;3771A], that of a cloned DNA (DNA-U4\_MF458185) and that of the DNA-U4 consensus sequence determined by deep sequencing (DNA-U4\_ds).

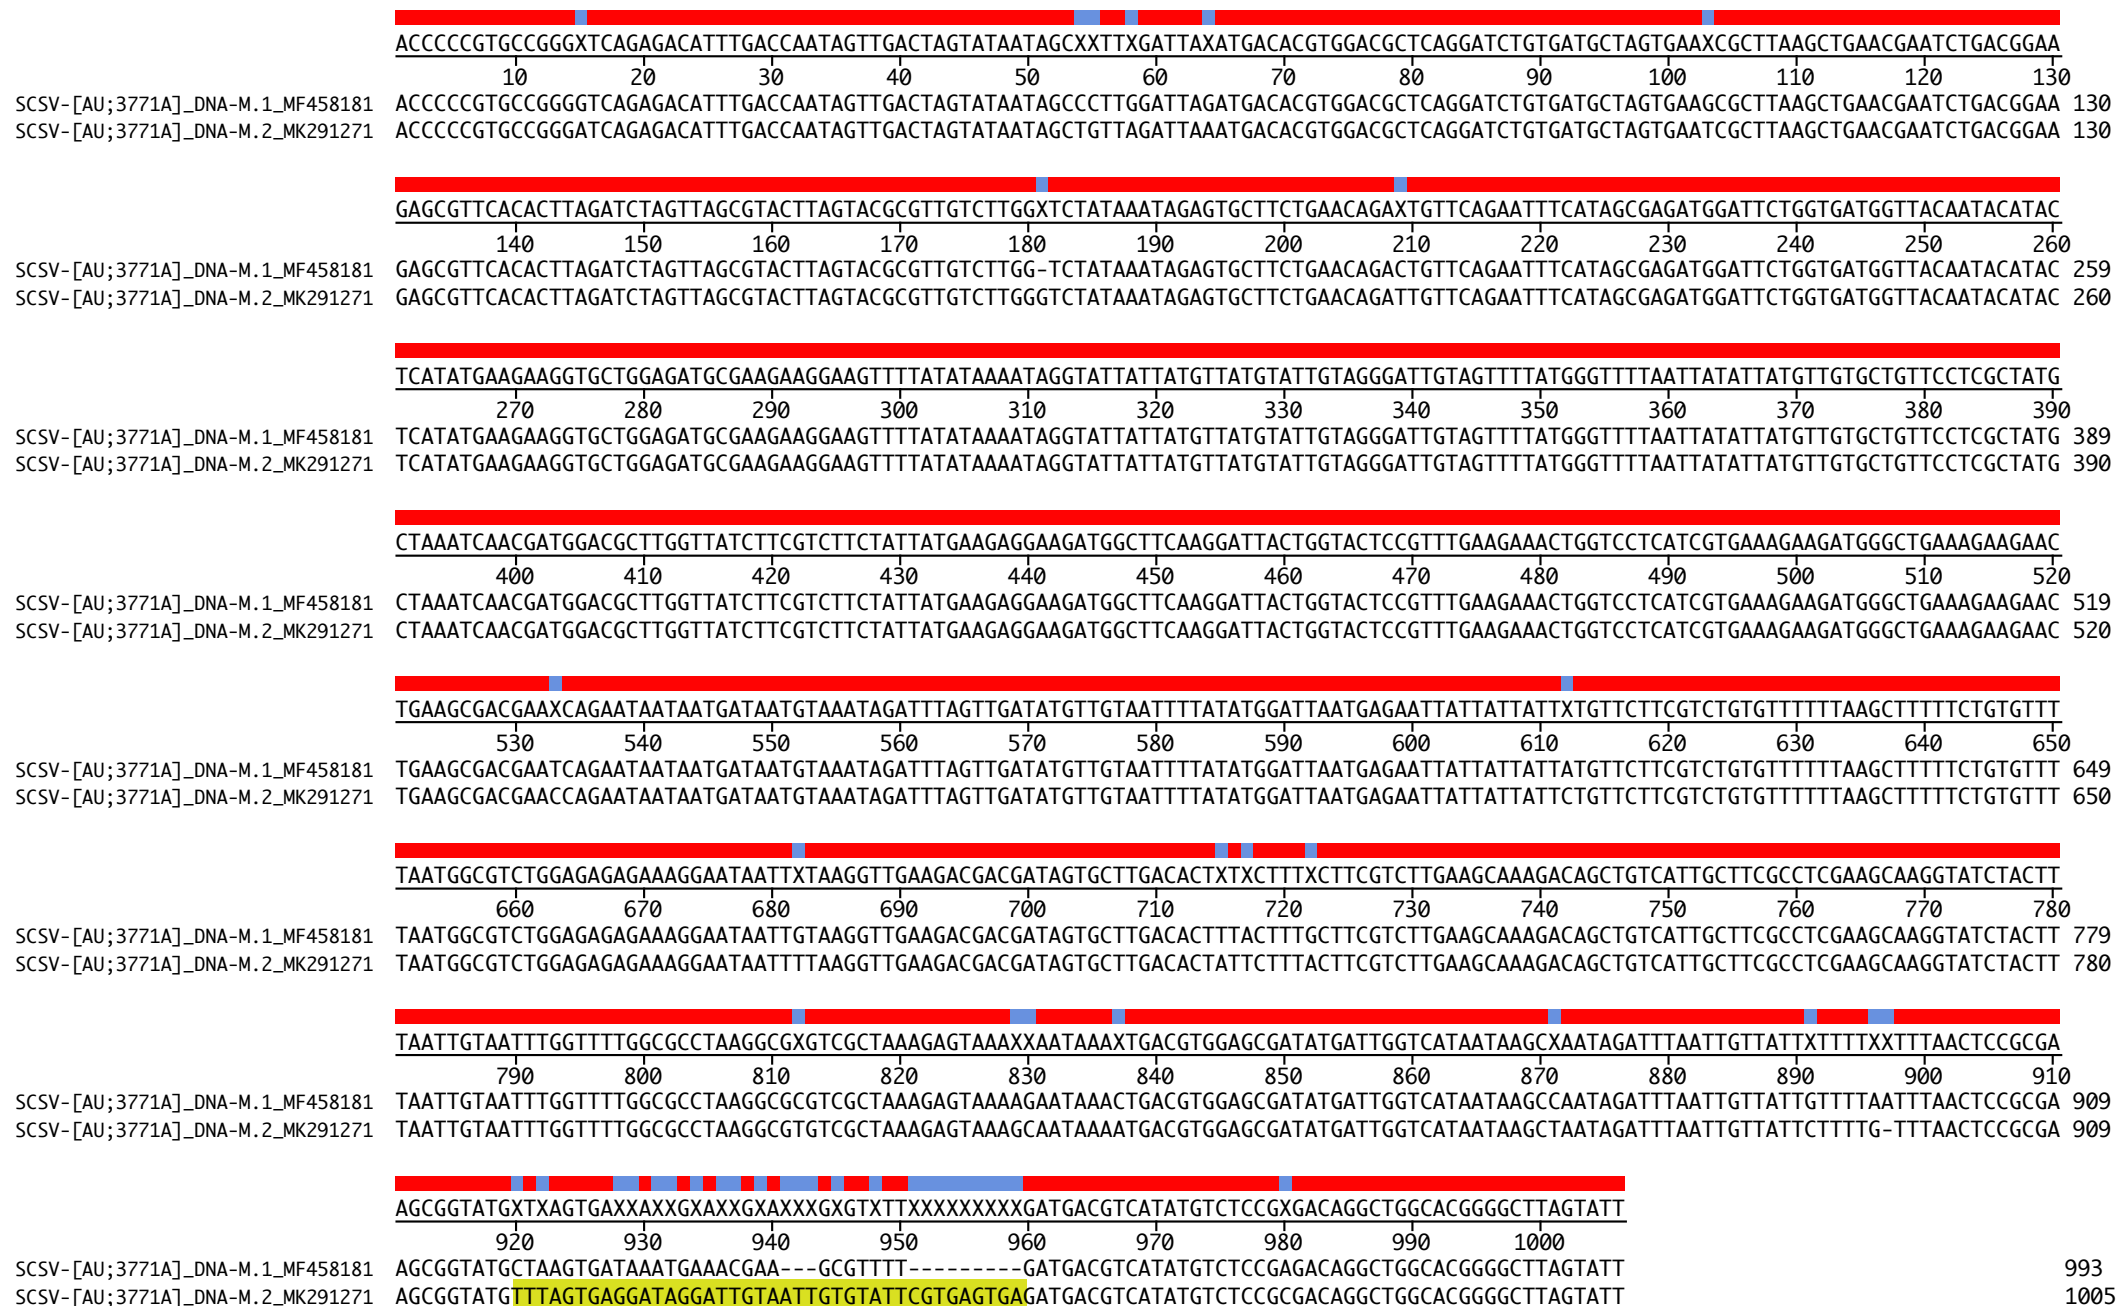

**Figure S4.** SCSV-[AU;3771A]\_DNA-M.1\_MF458181\_vs\_DNA-M.2\_MK291271 alignment. Alignment was performed using MegAlign of DNA Star. The yellow box indicates sequence homologous to DNA-R.

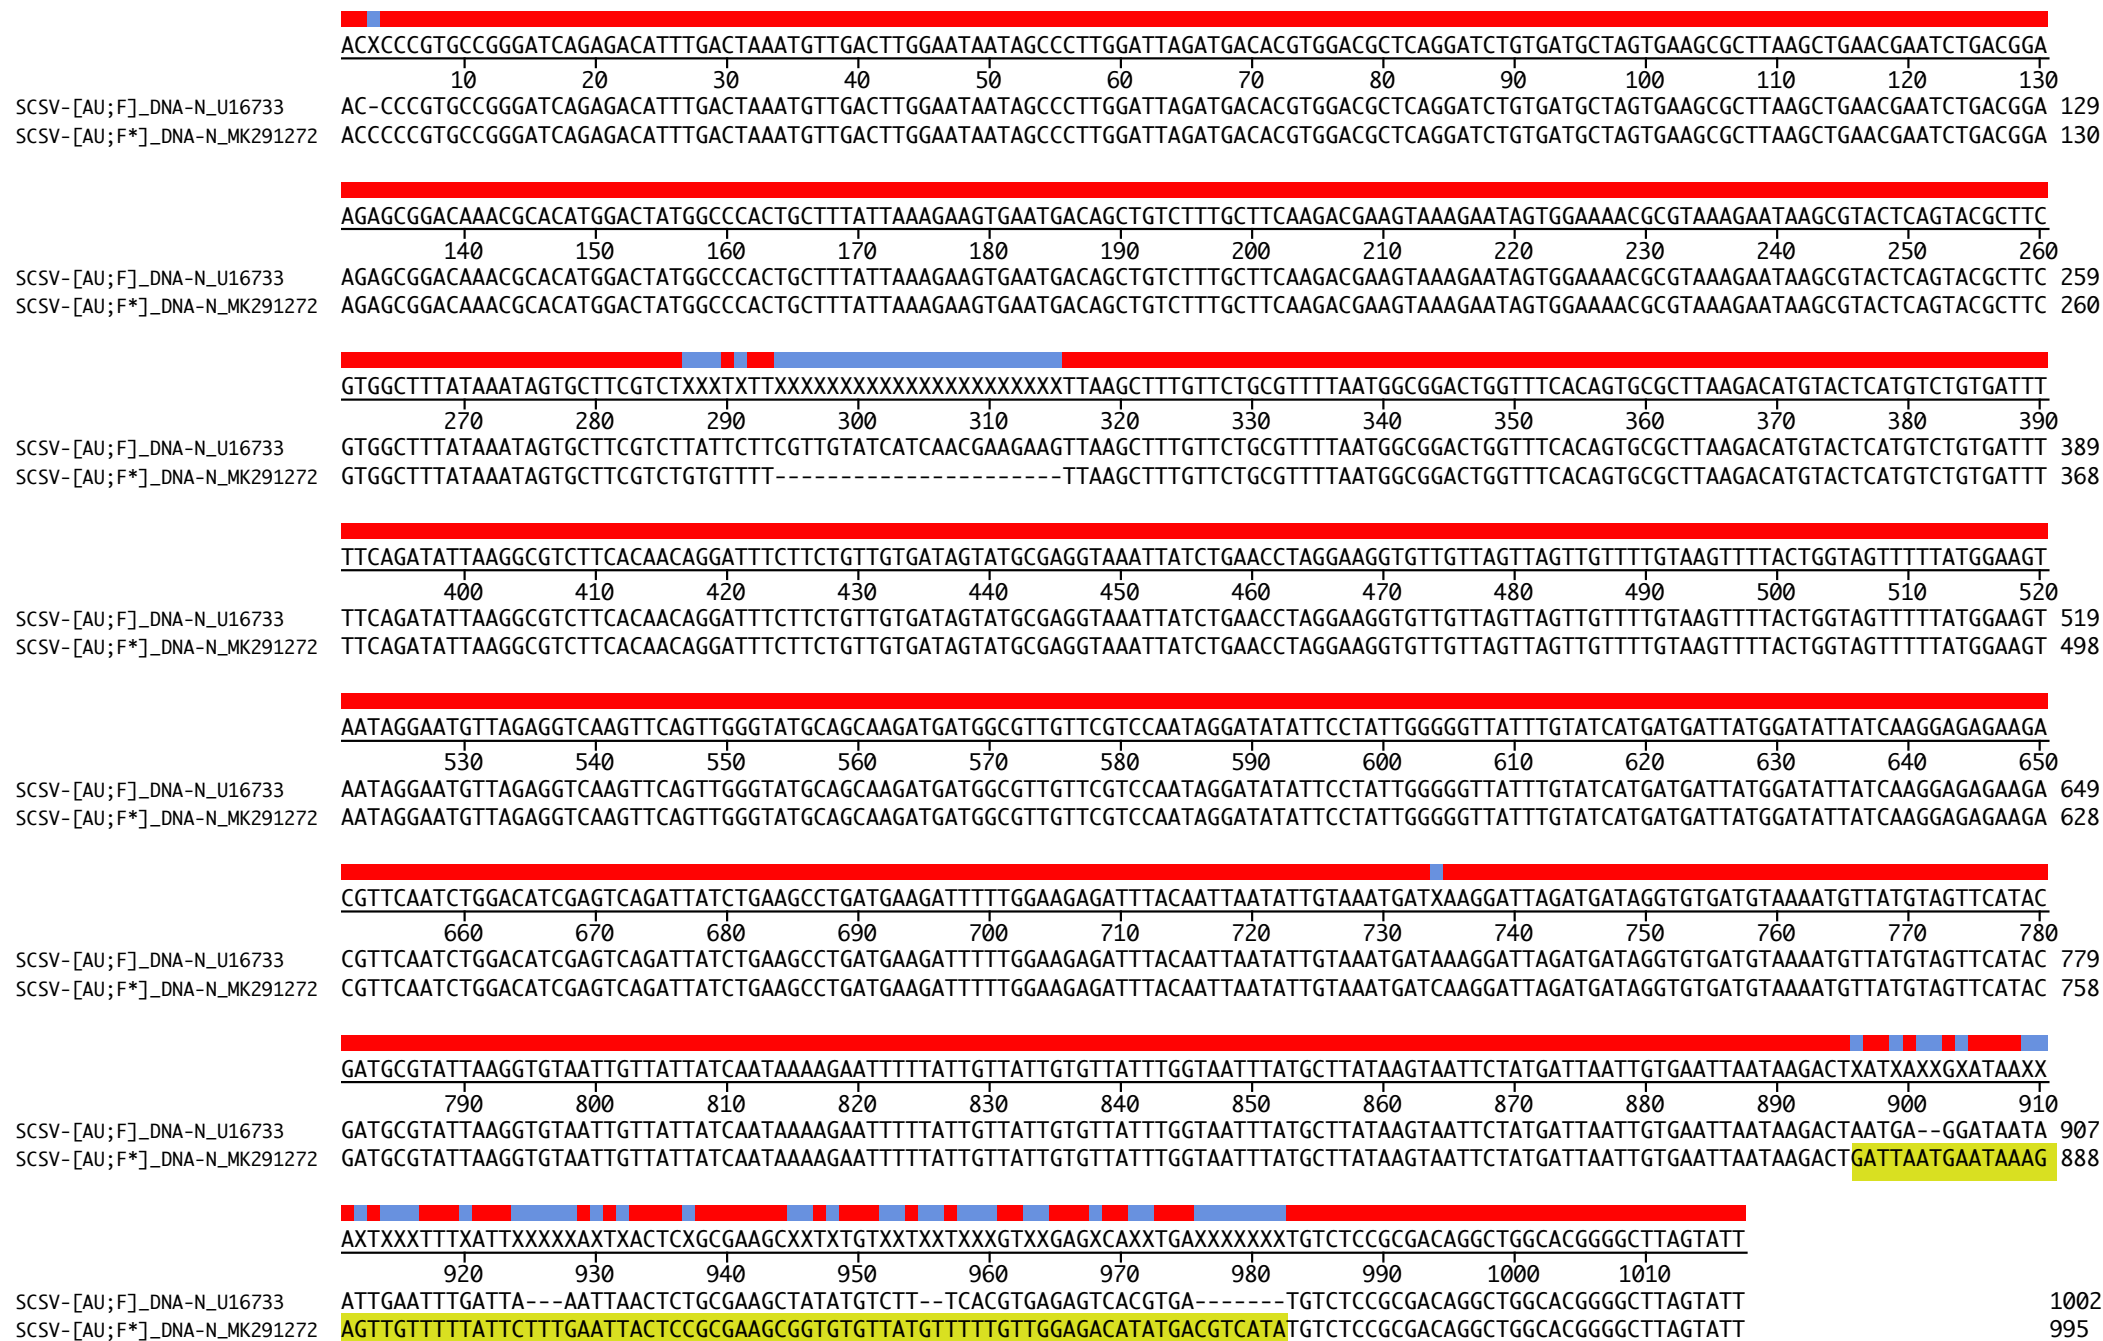

**Figure S5.** SCSV-[AU;F]\_DNA-N\_U16733 vs SCSV-[AU;F\*]\_DNA-N\_MK291272 alignment. Alignment was performed using MegAlign of DNA Star. The yellow box indicates sequence homologous to DNA-S.

**Table S1.** Primers used for amplification of SCSV DNAs

| DNA                              | Primer name<br>(direction) | Sequence (5'-3')                    | T <sub>m</sub> ,<br>C° | Use <sup>a, b</sup> |
|----------------------------------|----------------------------|-------------------------------------|------------------------|---------------------|
| nanovirus<br>DNAs <sup>c</sup>   | nano-STL-dir               | GGCTTAGATATTACCCC                   | 49.2                   | 2                   |
|                                  | nano-STL-rev               | GGTAATACTAAGCCCC                    | 49.2                   | 2 <sup>f</sup>      |
| nanovirus<br>DNA-U2 <sup>d</sup> | nano-U2-dir                | TGYAGAYRYCATGGAAGRA                 | 53.4                   | 2 <sup>f</sup>      |
| nanovirus<br>DNA-U4 <sup>e</sup> | nano-U4-dir                | GGTTGAHGRHGAHGAYSTGGARTA            | 61.8                   | 2 <sup>f</sup>      |
| R                                | SCSV-R-dir                 | TTCGTCTACAGTCCTTCGTCTCCATCAA        | 65.1                   | 1, 4                |
|                                  | SCSV-R-rev                 | GTAGACGAATAATTTGGGTGTATGGCCC        | 65.1                   | 1, 4                |
|                                  | SCSV-R790-dir              | GAATACGTCAATTATGGAGTCATTGAACAGCT    | 64.4                   | 1                   |
|                                  | SCSV-R790-rev              | ACGTATTCTCTCGAAGCTTCGAGGAAAGTCG     | 65.5                   | 1                   |
| M                                | SCSV-M-dir                 | GAAGATGGGCTGAAAGAAGAACTGAAGCG       | 66.7                   | 1, 4                |
|                                  | SCSV-M-rev                 | CCATCTTCTTTACGATGAGGACCAGTTTC       | 66.8                   | 1, 4                |
|                                  | SCSV-M390-dir              | CTAAATCAACGATGGACGCTTGGTTATC        | 63.7                   | 1                   |
|                                  | SCSV-M390-rev              | TGATTTAGCATAGCGAGGAACAGCACAAAC      | 65.3                   | 1                   |
| N                                | SCSV-N-dir                 | GGAAGGTGTTGTTAGTTAGTTGTTTGTAA       | 61.3                   | 1, 4                |
|                                  | SCSV-N-rev                 | CACCTTCCTAGGTTTCAGATAATTTACCTCG     | 65.4                   | 1, 4                |
|                                  | SCSV-N420-dir              | GCTTCGTGGCTCTATAAATAGTGCTTCGTCTT    | 63.4                   | 1                   |
|                                  | SCSV-N420-rev              | CACGAAGCGTACTGAGTACGCTTATTCTTTACG   | 65.0                   | 1                   |
| C                                | SCSV-C-dir                 | GAGTTATGGAGGAGATGCATTACAAGCTT       | 63.9                   | 1, 4                |
|                                  | SCSV-C-rev                 | CCATAACTCTCCATTTCAGATTTA            | 55.9                   | 1, 4                |
| S                                | SCSV-S-dir                 | GGAGGTTAAGCCATTGCTGATGGTTCAAG       | 68.1                   | 1, 4                |
|                                  | SCSV-S-rev                 | TAACCTCCGCTCCAGTAACATCTCTCTTAT      | 65.4                   | 1, 4                |
| U1                               | SCSV-U1-dir                | GTGATTAACGTGAAGGTACTGAGGTT          | 61.6                   | 1, 4                |
|                                  | SCSV-U1-rev                | CGTTAATCACTTGAACCTTCTC              | 56.5                   | 1, 4                |
| U2                               | SCSV_37-U2frDir            | CTAAGATGCCTAGAGATGGACCTGCAAGGTG     | 69.5                   | 1                   |
|                                  | SCSV_37-U2frRev            | CTTAGGATAAGCCTTCACTCTTCTTCCATG      | 65.4                   | 1                   |
|                                  | SCSV_37-U2fr2dir           | AATTATAGATATCAAGTGTTACTCTG          | 56.3                   | 1, 4                |
|                                  | SCSV_37-U2fr2rev           | CTATAATTACCATAATCATACAAATCA         | 54.3                   | 1, 4                |
|                                  | SCSV-U2-224-dir            | GATTTGTTCTGGGTTTATATGAA             | 55.3                   | 1                   |
|                                  | SCSV-U2-224-rev            | CAGAACAAATCTTGTTCTTCCTT             | 54.2                   | 1                   |
| U4                               | SCSV_37-U4fr2dir           | GTGAGGATCATGAATATGTACAG             | 57.1                   | 1, 4                |
|                                  | SCSV_37-U4fr2rev           | TCCTCACCACCTTAAGTAAATCAC            | 59.7                   | 1, 4                |
|                                  | SCSV-U4-340-dir            | GGAGGAATTATTGGCTGGTTATCTGGAA        | 63.7                   | 1,3, 4              |
|                                  | SCSV-U4-340-rev            | ATTCTCTCTAATATCATACTTATAACAATACCAGG | 63.6                   | 1, 4                |
|                                  | SCSV-U4.1-932-rev          | CGTTTCATTTATCACTTAACATATCGC         | 58.9                   | 3                   |
|                                  | SCSV-U4.2-932-rev          | TCTCCAACAAAACTTAACATATCGC           | 58.5                   | 3                   |

a – Primers used for PCR amplification of the corresponding DNAs with the purpose of: (1) entire component amplification and cloning, (2) partial amplification, (3) specific amplification of DNA-U4.1 or DNA-U4.2 fragment by PCR, (4) detection of SCSV DNAs in field samples of symptomatic subterranean clover.

b – PCR amplifications employing component-specific primers were performed at annealing temperatures corresponding to a minimal T<sub>m</sub> of a given primer pair.

c – Primers designed based on the DNA sequence in the region with potential stem-loop structure (STL) of nanovirus DNAs

d – Primers designed on the basis of the alignment of the nanovirusDNA-U2 sequences.

e – Primers designed on the basis of the alignment of the nanovirus DNA-U4 sequences.

f – PCR amplifications using nano-STL-rev in combination with a degenerate primer were performed with Taq II DNA polymerase as follows: 95°C, 5 min; 5 cycles of: 95°C, 30 s, 45°C, 45 s, 72°C, 2 min; followed by 35 cycles of: 95°C, 30 s, gradient 45°C to 65°C, 45 s, 72°C, 45 s; final elongation: 72°C, 4 min.

**Table S2.** Summary of deep sequencing data from three SCSV samples

| Sample          |                      | SCSV-[AU;3771A]<br>(1,519,544 total reads) |            |           | SCSV-[AU; 2534B]<br>(1,560,076 total reads) |            |           | SCSV-[AU;-F*]<br>(1,984,716 total reads) |            |           |
|-----------------|----------------------|--------------------------------------------|------------|-----------|---------------------------------------------|------------|-----------|------------------------------------------|------------|-----------|
|                 |                      | Reads                                      | % of reads | Cov. Mean | Reads                                       | % of reads | Cov. Mean | Reads                                    | % of reads | Cov. Mean |
| DNA             |                      |                                            |            |           |                                             |            |           |                                          |            |           |
| Genomic DNAs    | DNA-R                | 4,273                                      | 0.28       | 6,878     | 32,450                                      | 2.08       | 6,156     | 26,548                                   | 1.34       | 4,881     |
|                 | DNA-S                | 10,419                                     | 0.69       | 1,849     | 73,136                                      | 4.69       | 14,378    | 33,825                                   | 1.70       | 6,496     |
|                 | DNA-M                | 27,366                                     | 1.80       | 4,394     | 68,165                                      | 4.37       | 12,132    | 400,292                                  | 20.17      | 72,184    |
|                 | DNA-M.2 <sup>a</sup> | 12,979                                     | 0.85       | 2,074     |                                             |            |           |                                          |            |           |
|                 | DNA-N                | 11,943                                     | 0.79       | 2,072     | 100,037                                     | 6.41       | 19,303    | 12,764                                   | 0.64       | 2,343     |
|                 | DNA-C                | 20,471                                     | 1.35       | 3,602     | 43,620                                      | 2.80       | 8,152     | 6,168                                    | 0.31       | 796       |
|                 | DNA-U1               | 5,727                                      | 0.38       | 929       | 40,129                                      | 2.57       | 7,436     | 121,430                                  | 6.12       | 22,534    |
|                 | DNA-U2               | 2,510                                      | 0.17       | 421       | 41,474                                      | 2.66       | 7,863     | 2,513                                    | 0.13       | 431       |
|                 | DNA-U4               | 86,676                                     | 5.70       | 14,167    | 109,090                                     | 6.99       | 19,932    |                                          |            |           |
|                 | DNA-U4.2             |                                            |            |           | 123,375                                     | 7.91       | 22,640    |                                          |            |           |
| alphasatellites | SCSA 1               | 169,370                                    | 11.15      | 29,851    | 293,801                                     | 18.83      | 57,449    |                                          |            |           |
|                 | SCSA 1.1             |                                            |            |           |                                             |            |           | 91,250                                   | 4.60       | 17,207    |
|                 | SCSA 1.2             |                                            |            |           |                                             |            |           | 93,260                                   | 4.70       | 17,178    |
|                 | SCSA 2               | 125,028                                    | 8.23       | 22,230    | 192,094                                     | 12.31      | 38,112    | 460,008                                  | 23.18      | 89,133    |
|                 | SYSA 3               | 31,974                                     | 2.10       | 5,520     |                                             |            |           |                                          |            |           |
|                 | total                | 508,736                                    | 33.48      |           | 1,117,371                                   | 71.62      |           | 1,248,058                                | 62.88      |           |

Circularized consensus sequences were generated from *de novo* assembly of deep sequencing reads.

Cov. Mean – average coverage.

a – recombinant with DNA-R

**Table S3.** Nucleotide substitutions

| Comparison of two different SCSV isolates                                                 | Total changes | % divergence | C/A | G/A | T/A | G/C | T/C | T/G | indel   | other                              |
|-------------------------------------------------------------------------------------------|---------------|--------------|-----|-----|-----|-----|-----|-----|---------|------------------------------------|
| SCSV-[AU;3771A]_DNA-R_MF458178<br>SCSV-[AU;2534B]_DNA-R_MK035728                          | 12            | 1,2          | 1   | 3   | 1   | 1   | 4   | 2   | 0       |                                    |
| SCSV-[AU;3771A]_DNA-S_MF458179<br>SCSV-[AU;2534B]_DNA-S_MK035729                          | 38            | 3,8          | 1   | 8   | 8   | 4   | 11  | 5   | 1       |                                    |
| SCSV-[AU;3771A]_DNA-C_MF458180<br>SCSV-[AU;2534B]_DNA-C_MK035730                          | 21            | 1,7          | 0   | 5   | 4   | 2   | 3   | 3   | 4       |                                    |
| SCSV-[AU;3771A]_DNA-M_MF458181<br>SCSV-[AU;2534B]_DNA-M_MK035731                          | 50            | 3,7          | 2   | 6   | 8   | 6   | 10  | 4   | 14      |                                    |
| SCSV-[AU;3771A]_DNA-N_MF458182<br>SCSV-[AU;2534B]_DNA-N_MK035732                          | 11            | 1            | 1   | 4   | 1   | 0   | 2   | 2   | 1       |                                    |
| SCSV-[AU;3771A]_DNA-U1_MF458183<br>SCSV-[AU;2534B]_DNA-U1_MK035733                        | 26            | 2,5          | 2   | 9   | 2   | 4   | 5   | 2   | 2       |                                    |
| SCSV-AU;3771A]_DNA-U2_MF458184<br>SCSV-[AU;2534B]_DNA-U2_MK035734                         | 15            | 1,4          | 1   | 4   | 1   | 2   | 3   | 3   | 1       |                                    |
| SCSV-[AU;3771A]_DNA-U4_MF458185<br>SCSV-[AU;2534B]_DNA-U4_MK035735                        | 38            | 3,7          | 2   | 11  | 2   | 4   | 10  | 7   | 2       |                                    |
| Sum                                                                                       | 211           |              | 10  | 50  | 27  | 23  | 48  | 28  | 25      |                                    |
| Comparison of cloned DNAs vs deep sequenced DNAs (_ds) of the same isolate (SCSV-[3771A]) | Total changes | % divergence | C/A | G/A | T/A | G/C | T/C | T/G | indel   | other                              |
| SCSV-[AU;3771A]_DNA-R_MF458178<br>SCSV-[AU;3771A]_DNA-R_ds                                | 0             | 0            | 0   | 0   | 0   | 0   | 0   | 0   | 0       |                                    |
| SCSV-[AU;3771A]_DNA-S_MF458179<br>SCSV-[AU;3771A]_DNA-S_ds                                | 5             | 0,5          | 0   | 0   | 1   | 0   | 3   | 1   | 0       |                                    |
| SCSV-[AU;3771A]_DNA-C_MF458180<br>SCSV-[AU;3771A]_DNA-C_ds                                | 7             | 0,7          | 0   | 1   | 0   | 1   | 3   | 2   | 0       |                                    |
| SCSV-[AU;3771A]_DNA-M_MF458181<br>SCSV-[AU;3771A]_DNA-M_ds                                | 2             | 0,2          | 0   | 0   | 0   | 0   | 0   | 2   | 0       |                                    |
| SCSV-[AU;3771A]_DNA-M_MF458181<br>SCSV-[AU;3771A]_DNA-M.2_ds (recombinant with DNA-R)     | 25            | 3,7          | 2   | 6   | 3   | 4   | 5   | 2   | 2 + 12† | † part of 32 nt derived from DNA-R |
| SCSV-[AU;3771A]_DNA-N_MF458182<br>SCSV-[AU;3771A]_DNA-N_ds                                | 8             | 0,8          | 1   | 3   | 1   | 0   | 2   | 1   | 0       |                                    |
| SCSV-[AU;3771A]_DNA-U1_MF458183<br>SCSV-[AU;3771A]_DNA-U1_ds                              | 15            | 1,4          | 1   | 5   | 1   | 3   | 3   | 1   | 1       |                                    |
| SCSV-AU;3771A]_DNA-U2_MF458184<br>SCSV-AU;3771A]_DNA-U2_ds                                | 0             | 0            | 0   | 0   | 0   | 0   | 0   | 0   | 0       |                                    |
| SCSV-[AU;3771A]_DNA-U4_MF458185<br>SCSV-[AU;3771A]_DNA-U4_ds                              | 2             | 0,2          | 0   | 1   | 0   | 0   | 0   | 1   | 0       |                                    |
| Sum, counting recombination event as 1                                                    | 64            |              | 4   | 16  | 6   | 8   | 16  | 10  | 1       |                                    |
| Comparison of published SCSV-[AU;F] DNAs with deep sequenced SCSV-[AU;F*] progeny         | Total changes | % divergence | C/A | G/A | T/A | G/C | T/C | T/G | indel   | other                              |
| SCSV-[AU;F]_DNA-R_AJ290434<br>SCSV-[AU;F*]_DNA-R                                          | 0             | 0            | 0   | 0   | 0   | 0   | 0   | 0   | 0       |                                    |
| SCSV-[AU;F]_DNA-S_U16734<br>SCSV-[AU;F*]_DNA-S                                            | 12            | 1            | 1   | 1   | 2   | 1   | 2   | 3   | 2       |                                    |
| SCSV-[AU;F]_DNA-C_U16732<br>SCSV-[AU;F*]_DNA-C                                            | 3             | 0,3          | 0   | 0   | 0   | 2   | 1   | 0   | 0       |                                    |
| SCSV-[AU;F]_DNA-M_U16730<br>SCSV-[AU;F*]_DNA-M                                            | 29            | 1,8          | 2   | 4   | 1   | 2   | 6   | 3   | 11      |                                    |
| SCSV-[AU;F]_DNA-N_U16733<br>SCSV-[AU;F*]_DNA-N (Δ 22nt & 87nt recombinant with DNA-S)     | 36            | 3,6          | 2   | 9   | 8   | 0   | 6   | 8   | 1 + Δ22 | 87 nt recombinant with DNA-S       |
| SCSV-[AU;F]_DNA-U1_U16736<br>SCSV-[AU;F*]_DNA-U1                                          | 11            | 0,8          | 1   | 3   | 1   | 0   | 3   | 0   | 3       |                                    |
| SCSV-[AU;F*]_DNA-U2_MF458186 (cloned DNA)<br>SCSV-[AU;F*]_DNA-U2                          | 3             | 0,3          | 2   | 1   | 0   | 0   | 0   | 0   | 0       |                                    |
| SCSA1-[AU;F]_alphasat_1_U16731<br>SCSA1-[AU;F*]_alphasat_1.1                              | 3             | 0,3          | 0   | 0   | 1   | 0   | 1   | 1   | 0       |                                    |
| SCSA1-[AU;F]_alphasat_1_U16731<br>SCSA1-[AU;F*]_alphasat_1.2 (Δ24 nt)                     | 4             | 0,3          | 1   | 0   | 1   | 0   | 1   | 0   | Δ 24    |                                    |
| SCSA2-[AU;F]_alphasat_2_U16735<br>SCSA2-[AU;F*]_alphasat_2                                | 1             | 0,1          | 1   | 0   | 0   | 0   | 0   | 0   | 0       |                                    |
| Sum, counting deletions >20 nt and recobination event as 1                                | 102           |              | 10  | 18  | 14  | 5   | 20  | 15  | 16      |                                    |



**Table S5.** Detection by PCR of SCSV DNAs in field samples of symptomatic subterranean clover

| Sample                      | DNA | -R               |  | -S  |                  | -M  |     | -C  |     | -N  | -U1 |     | -U2 |     | -U4 <sup>a</sup> |     | -U4 <sup>b</sup> |     |
|-----------------------------|-----|------------------|--|-----|------------------|-----|-----|-----|-----|-----|-----|-----|-----|-----|------------------|-----|------------------|-----|
|                             |     | x35 <sup>c</sup> |  | x35 | x43 <sup>d</sup> | x35 | x43 | x35 | x43 | x43 | x35 | x43 | x35 | x43 | x35              | x43 | x35              | x43 |
| 1                           |     | -                |  | -   | nt <sup>e</sup>  | -   | nt  | -   | nt  | -   | -   | nt  | -   | -   | -                | -   | -                | -   |
| 2                           |     | -                |  | -   | nt               | -   | nt  | -   | nt  | -   | -   | nt  | -   | -   | -                | -   | -                | -   |
| 3                           |     | ++               |  | +   | ++               | ++  | nt  | -   | ++  | +   | +   | nt  | +   | +   | -/+              | ++  | -                | -/+ |
| 4                           |     | ++               |  | -   | +                | -   | +   | -   | ++  | ++  | -   | ++  | -   | +   | -                | -   | -                | -   |
| 5                           |     | ++               |  | -   | ++               | -   | +   | -   | -/+ | -   | -   | -/+ | -   | +/- | -                | -   | -                | -   |
| 6                           |     | +++              |  | +++ | nt               | +++ | nt  | +++ | nt  | +++ | +++ | nt  | +++ | +++ | +++              | +++ | +                | ++  |
| 7                           |     | ++               |  | +   | nt               | ++  | nt  | ++  | nt  | +   | +/- | nt  | +   | +   | -/+              | +   | -/+              | -/+ |
| 8                           |     | -                |  | -   | nt               | -   | nt  | -   | nt  | -   | -   | nt  | -   | -   | -                | -   | -                | -   |
| 9                           |     | -                |  | -   | nt               | -   | nt  | -   | nt  | -   | -   | nt  | -   | -   | -                | -   | -                | -   |
| 10                          |     | ++               |  | -   | ++               | ++  | nt  | -   | ++  | +   | -   | ++  | +   | ++  | -                | +   | +                | -/+ |
| 11                          |     | ++               |  | +   | nt               | ++  | nt  | -   | -   | +   | +   | nt  | +   | ++  | -/+              | ++  | -/+              | +   |
| 12                          |     | ++               |  | ++  | nt               | ++  | nt  | ++  | nt  | ++  | ++  | nt  | +   | ++  | +                | +   | +                | +   |
| 13                          |     | ++               |  | -   | -                | -   | ++  | -   | -   | -   | -   | +/- | -   | +   | -                | +/- | -                | -   |
| 14                          |     | ++               |  | ++  | nt               | ++  | nt  | ++  | nt  | ++  | ++  | nt  | ++  | ++  |                  | ++  | +                | +   |
| Total SCSV-positive samples |     | 10               |  |     | 9                |     | 10  |     | 8   | 8   |     | 10  |     | 10  |                  | 8   |                  | 7   |

Subterranean clover plants showing symptoms of potential SCSV infection were collected on December 24, 2018, in Harrison, ACT.

After total DNA extractions, PCR reactions were performed using primers specific for SCSV DNA (indicated in Table S1), the amplified DNAs were subjected to agarose gel electrophoresis. The relative amounts of amplification products from different samples were estimated visually by staining intensity, ranging from traces (-/+) to very high amplification levels (+++).

a – primers SCSV\_37-U4fr2dir and SCSV\_37-U4fr2rev.

b – primers SCSV-U4-340-dir and SCSV-U4-340-rev.

c – 35 cycles of PCR amplification.

d – 43 cycles of PCR amplification.

e – if 35 PCR cycles yielded amplified DNA of a given genome component, no amplification using 43 cycles was done.

**Table S6.** Detection of SCSV DNAs in field samples after rolling circle amplification followed by PCR.

| Sample | DNA | -S  | -C  | -N  | -U4 <sup>b</sup> |
|--------|-----|-----|-----|-----|------------------|
| 1      |     | +++ | +++ | +++ | +++              |
| 4      |     | +++ | +++ | +++ | +++              |
| 5      |     | +++ | +++ | +++ | +++              |
| 11     |     | +++ | +++ | +++ | +++              |
| 13     |     | +++ | +++ | +++ | +++              |

Total DNA extractions of samples 1, 4, 5, 11 and 13 (same as in Table S5) were subjected to rolling circle amplification followed by PCR amplification (35 cycles) using the same SCSV component-specific primers as in Table S5.
